# Supplementary material
Source: Springer Nature journal article supplement (https://www.springermedizin.de/resource/supplementary/12916_2006_85_MOESM2_ESM.pdf/9599136)
Supplement: MOESM2 [file 9599136]

| Age   | Sex    | FACTORS             |       | % of subjects in each subgroup |  |
|-------|--------|---------------------|-------|--------------------------------|--|
|       |        | Prior history       | GPRD  | BIFAP                          |  |
| 20-49 | Female | None                | 0.78  | 1.63                           |  |
|       |        | upper GI pain       | 0.54  | 0.26                           |  |
|       |        | uncomplicated ulcer | 0.03  | 0.03                           |  |
|       |        | complicated ulcer   | 0.02  | 0.02                           |  |
|       | Male   | None                | 1.18  | 3.20                           |  |
|       |        | upper GI pain       | 0.62  | 0.37                           |  |
|       |        | uncomplicated ulcer | 0.04  | 0.11                           |  |
|       |        | complicated ulcer   | 0.01  | 0.04                           |  |
| 50-59 | Female | None                | 1.81  | 3.45                           |  |
|       |        | upper GI pain       | 1.30  | 0.79                           |  |
|       |        | uncomplicated ulcer | 0.02  | 0.05                           |  |
|       |        | complicated ulcer   | 0.03  | 0.02                           |  |
|       | Male   | None                | 3.57  | 8.51                           |  |
|       |        | upper GI pain       | 1.84  | 1.53                           |  |
|       |        | uncomplicated ulcer | 0.15  | 0.48                           |  |
|       |        | complicated ulcer   | 0.05  | 0.20                           |  |
| 60-69 | Female | None                | 6.01  | 6.58                           |  |
|       |        | upper GI pain       | 3.74  | 1.92                           |  |
|       |        | uncomplicated ulcer | 0.20  | 0.18                           |  |
|       |        | complicated ulcer   | 0.06  | 0.11                           |  |
|       | Male   | None                | 9.94  | 11.26                          |  |
|       |        | upper GI pain       | 5.01  | 2.43                           |  |
|       |        | uncomplicated ulcer | 0.57  | 0.91                           |  |
|       |        | complicated ulcer   | 0.18  | 0.24                           |  |
| 70-79 | Female | None                | 10.13 | 11.95                          |  |
|       |        | upper GI pain       | 6.27  | 3.67                           |  |
|       |        | uncomplicated ulcer | 0.34  | 0.44                           |  |
|       |        | complicated ulcer   | 0.12  | 0.26                           |  |
|       | Male   | None                | 11.77 | 12.32                          |  |
|       |        | upper GI pain       | 6.26  | 2.69                           |  |
|       |        | uncomplicated ulcer | 0.67  | 1.19                           |  |
|       |        | complicated ulcer   | 0.27  | 0.42                           |  |
| >=80  | Female | None                | 10.97 | 11.95                          |  |
|       |        | upper GI pain       | 5.40  | 1.90                           |  |
|       |        | uncomplicated ulcer | 0.34  | 0.22                           |  |
|       |        | complicated ulcer   | 0.19  | 0.26                           |  |
|       | Male   | None                | 5.94  | 6.45                           |  |
|       |        | upper GI pain       | 3.14  | 1.35                           |  |
|       |        | uncomplicated ulcer | 0.23  | 0.35                           |  |
|       |        | Complicated ulcer   | 0.25  | 0.35                           |  |
| TOTAL |        |                     | 100%  | 100%                           |  |
